# Supplementary material
Source: PubMed Central journal article supplement (PMC3926205)
Supplement: NIHMS552148-supplement-01.pdf [file NIHMS552148-supplement-01.pdf]

## **Supplementary Information**

# **Influence of Polyethylene Glycol Density and Surface Lipid on Pharmacokinetics and Biodistribution of Lipid-Calcium-Phosphate Nanoparticles**

Yang Liu<sup>1</sup>, Yunxia Hu<sup>1</sup> and Leaf Huang<sup>1,2</sup>

<sup>1</sup> Division of Molecular Pharmaceutics and Center for Nanotechnology in Drug Delivery ,  
Eshelman School of Pharmacy, University of North Carolina at Chapel Hill, Chapel Hill, NC  
27599

<sup>2</sup> Corresponding author. Email: leafh@unc.edu

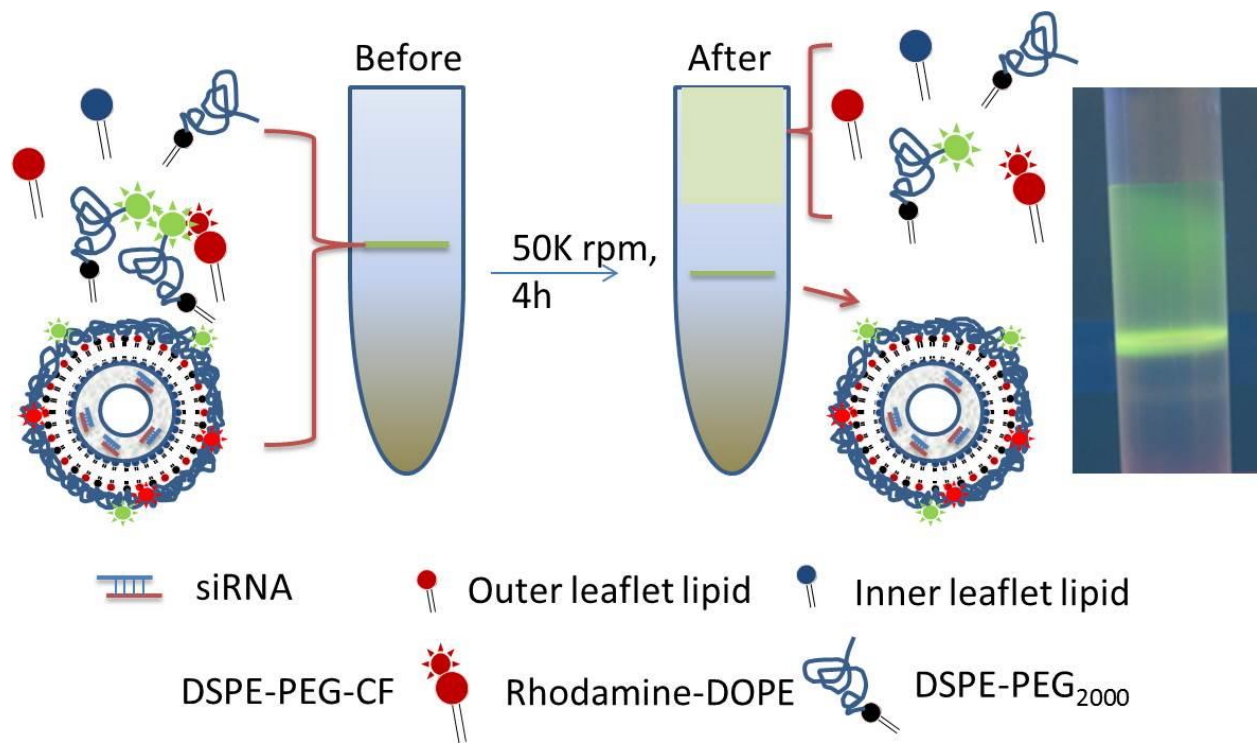

Figure S1. Schematic illustration of sucrose gradient centrifugation for purification.

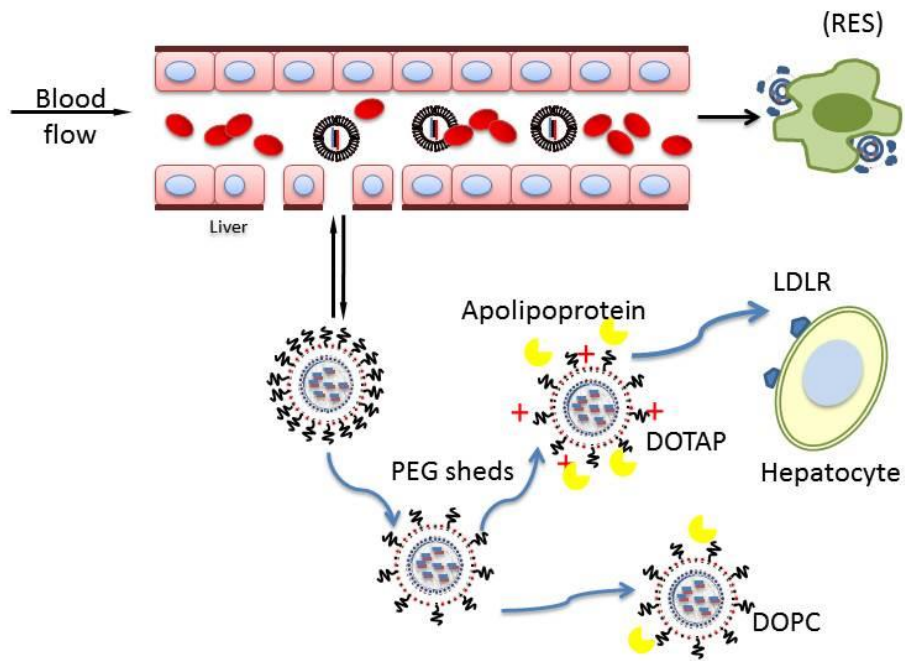

Figure S2. Proposed *in vivo* fate of LCP-DOTAP and -DOPC NPs.
